# Supplementary material
Source: PubMed Central journal article supplement (PMC156032)
Supplement: nar_31_10_2671__1.pdf [file nar_31_10_2671__1.pdf]

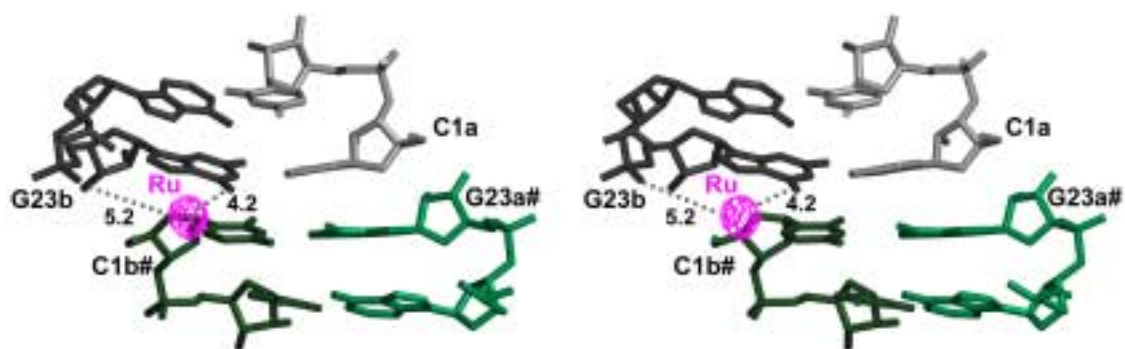

Fig. S1a

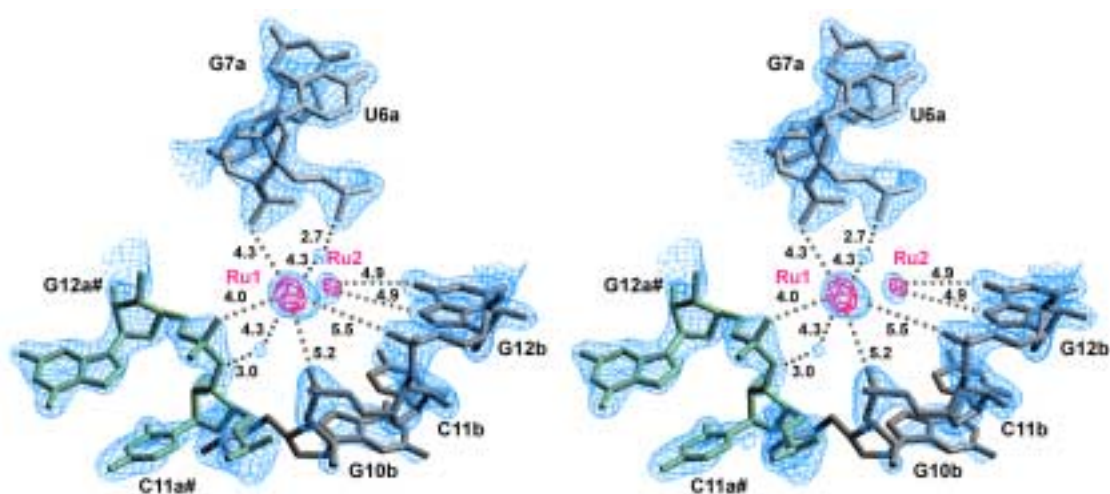

Fig. S1b

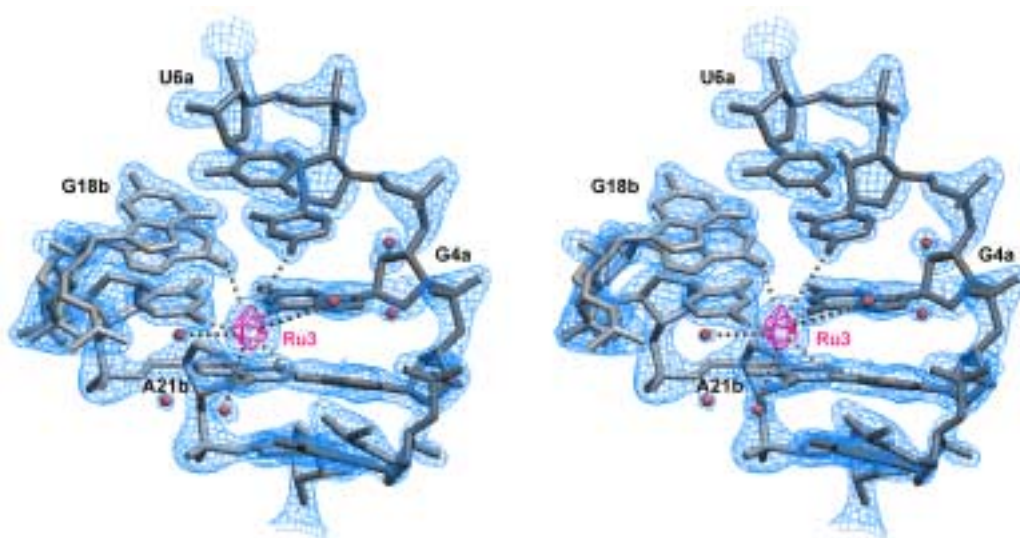

Fig. S1c

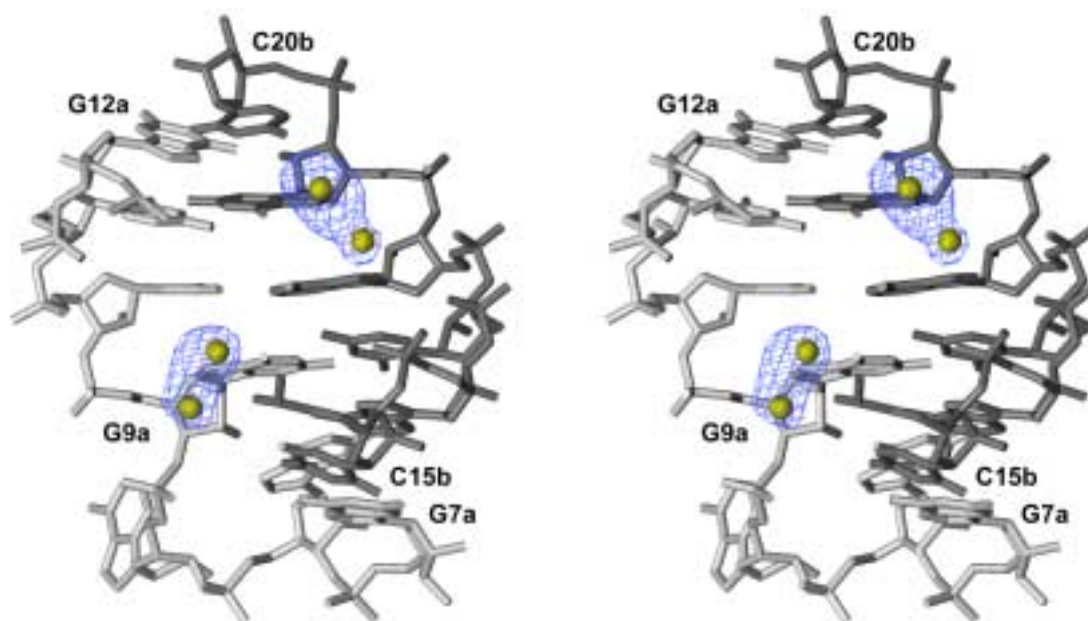

**Fig. S2**

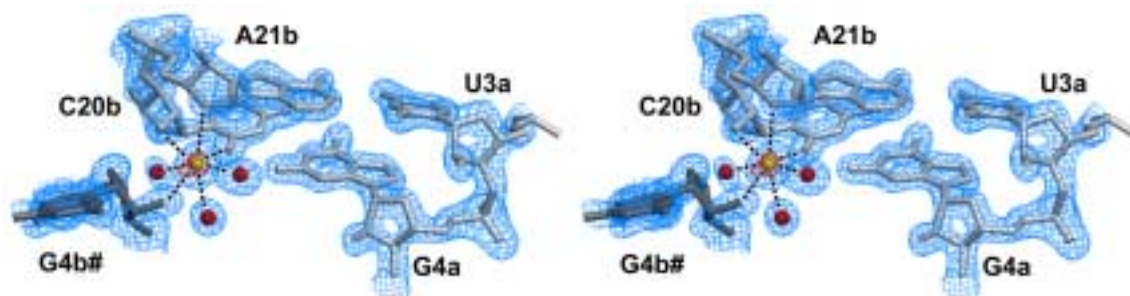

**Fig. S3**

## LEGEND TO FIGURES IN SUPPLEMENTARY MATERIAL

**Figure S1** : (a) View of the main ruthenium hexammine binding sites in the subtype-A DIS duplex localized between two stacked helices. The anomalous map is contoured at  $10 \sigma$  above mean level. (b-c) Ruthenium hexammine binding sites in the subtype-B DIS duplex. The (2Fo-Fc) electron density map ( $1.7 \sigma$  above mean level) and the anomalous difference map ( $4.0 \sigma$  above mean level) are shown in blue and magenta, respectively. (b) Site 1 is localized in the major groove of the duplex and the cation is bound to four phosphates, as well as to a 2'-OH group and a phosphate of a symmetry-related molecule. Site 2, which is much weaker, involves binding to Hoogsteen sites of a guanine. (c) Site 3 in the major groove of a UGC/ACG sequence and to surrounding water molecules (represented as red spheres).

**Figure S2** : Loose binding of  $\text{Sr}^{2+}$  ions. (2Fc-Fo) electron density map contoured at  $1.4 \sigma$  above mean level is represented in blue around two delocalised strontium binding sites in the subtype-A DIS duplex.

**Figure S3** : Potassium binding sites in the subtype-B DIS duplex. The (2Fo-Fc) electron density map contoured at  $1.4 \sigma$ , and the anomalous difference maps contoured at  $4.0 \sigma$  above mean level are shown in blue and red, respectively. Potassium ions and water molecules are represented as yellow and red spheres, respectively.
